# Supplementary material for: The Zebra Mussel (Dreissena polymorpha) as a Model Organism for Ecotoxicological Studies: A Prior 1H NMR Spectrum Interpretation of a Whole Body Extract for Metabolism Monitoring
Source: MDPI journal article supplement (doi:10.3390/metabo10060256), 2020-06-18
Supplement: s1 [file s1]

## *Supporting informations*

### **The zebra mussel (*Dreissena polymorpha*) as a model organism for ecotoxicological studies: a prior <sup>1</sup>H NMR spectrum interpretation of a whole body extract for metabolism monitoring.**

**Sophie Martine Prud'homme<sup>1,2\*</sup>, Younes Mohamed Ismail Hani<sup>1</sup>, Neil Cox<sup>3</sup>, Guy Lippens<sup>3</sup>, Jean-Marc Nuzillard<sup>4</sup> and Alain Geffard<sup>1,\*</sup>**

<sup>1</sup> Université de Reims Champagne-Ardenne, UMR-I 02 SEBIO (Stress Environnementaux et Biosurveillance des milieux aquatiques), Reims, France

<sup>2</sup> Université de Lorraine, CNRS, LIEC, F-57000, Metz, France (Curent affiliation)

<sup>3</sup> TBI, Université de Toulouse, CNRS, INRA, INSA de Toulouse, 135 avenue de Rangueil, 31077 Toulouse CEDEX 04, France

<sup>4</sup> Université de Reims Champagne Ardenne, CNRS, ICMR UMR 7312, 51097 Reims, France

\* Correspondence: [sophie.prud-homme@univ-lorraine.fr](mailto:sophie.prud-homme@univ-lorraine.fr), [alain.geffard@univ-reims.fr](mailto:alain.geffard@univ-reims.fr)

### **Summary of supporting information**

Supplementary Tables:

Table S1: Page S2

Table S2: Page S2

Table S3: Page S2

Table S4: Page S3

Table S5: Page S4

Table S6: Page S5

Supplementary Figures:

Figure S1: Page S6

Figure S2: Page S6

**Supplementary Table 1** – Physicochemical parameters of caging sites. Data are expressed as mean values  $\pm$  SD during the 2 months of caging. dO<sub>2</sub>: dissolved oxygen.

|                     | Conductivity ( $\mu$ S/cm) | dO <sub>2</sub> (mg/L) | pH              | Temperature ( $^{\circ}$ C) |
|---------------------|----------------------------|------------------------|-----------------|-----------------------------|
| <b>Saint-Mihiel</b> | 642.67 $\pm$ 68.69         | 11.07 $\pm$ 0.76       | 8.14 $\pm$ 0.28 | 9.58 $\pm$ 2.20             |
| <b>Lumes</b>        | 551.20 $\pm$ 70.38         | 9.69 $\pm$ 1.11        | 8.04 $\pm$ 0.19 | 9.85 $\pm$ 2.39             |
| <b>Nouzonville</b>  | 516.20 $\pm$ 103.94        | 9.72 $\pm$ 1.26        | 8.34 $\pm$ 0.25 | 9.84 $\pm$ 2.37             |
| <b>Liverdun</b>     | 369.60 $\pm$ 37.55         | 10.25 $\pm$ 1.01       | 8.11 $\pm$ 0.21 | 10.07 $\pm$ 2.79            |

**Supplementary Table 2** – Heavy metal (Cd, Cu, Ni, and Zn) concentration in soft tissues of zebra mussels from “Lac du Der-Chantecoq” population before (Control T0) and after 2 months caging in Saint-Mihiel, Lumes, Nouzonville or Liverdun sites. Soft tissues were mineralized with Suprapur® nitric acid for 24 h at 80  $^{\circ}$ C. The resulting acidic solutions were adjusted to 10 mL with ultrapure water, and samples were analyzed using an inductively coupled plasma optical emission spectrometer (ICP-AOS, Thermo Scientific iCAP 6300 DUO). Results are expressed as mean  $\mu$ g/kg wet weight  $\pm$  SD of 3 pools of 1.5g of total body weight (10 to 16 individuals).

|                     | Cd ( $\mu$ g/kg) | Ni ( $\mu$ g/kg) | Cu ( $\mu$ g/kg) | Pb ( $\mu$ g/kg) | Zn ( $\mu$ g/kg) |
|---------------------|------------------|------------------|------------------|------------------|------------------|
| <b>Control T0</b>   | 0,05 $\pm$ 0.01  | 0,65 $\pm$ 60.0  | 2,18 $\pm$ 0.72  | 0,03 $\pm$ 0.00  | 10,91 $\pm$ 0.68 |
| <b>Saint-Mihiel</b> | 0,06 $\pm$ 0.01  | 0,71 $\pm$ 0.25  | 2,73 $\pm$ 0.80  | 0,06 $\pm$ 0.01  | 9,50 $\pm$ 1.09  |
| <b>Lumes</b>        | 0,07 $\pm$ 0.02  | 0,64 $\pm$ 0.02  | 2,08 $\pm$ 0.63  | 0,13 $\pm$ 0.09  | 10,07 $\pm$ 2.49 |
| <b>Nouzonville</b>  | 0,07 $\pm$ 0.01  | 0,87 $\pm$ 0.13  | 2,13 $\pm$ 0.23  | 0,07 $\pm$ 0.01  | 10,11 $\pm$ 0.56 |
| <b>Liverdun</b>     | 0,06 $\pm$ 0.01  | 0,56 $\pm$ 0.09  | 3,17 $\pm$ 0.59  | 0,14 $\pm$ 0.05  | 11,40 $\pm$ 2.50 |

**Supplementary Table 3** – Organic pollutants concentration in soft tissues of zebra mussels from “Lac du Der-Chantecoq” population before (Control T0) and after 2 months caging in Saint-Mihiel, Lumes, Nouzonville or Liverdun sites. Freeze-dried homogenized mussels were treated with a modified QuEChERS extraction approach [1] and analyzed by atmospheric pressure gas chromatography/spectrometry (APGC), using an Agilent 7890B GC system (Agilent, Palo Alto, CA, USA). Results are expressed as mean  $\mu$ g/kg dry weight of 3 pools of 3g of total body weight (20 to 30 individuals).  $\Sigma$  HAPs: sum of all Polycyclic Aromatic Hydrocabones.  $\Sigma$  PBDEs: sum of all Polybrominated Diphenyl Ethers.  $\Sigma$  PCBs: sum of all PolyChlorinated Biphenyls.

|                     | $\Sigma$ PAHs ( $\mu$ g/kg) | $\Sigma$ PBDEs ( $\mu$ g/kg) | $\Sigma$ PCBs ( $\mu$ g/kg) |
|---------------------|-----------------------------|------------------------------|-----------------------------|
| <b>Control T0</b>   | 0,00                        | 0,00                         | 0,00                        |
| <b>Saint-Mihiel</b> | 0,00                        | 0,00                         | 0,00                        |
| <b>Lumes</b>        | 1,23                        | 0,12                         | 0,00                        |
| <b>Nouzonville</b>  | 1,05                        | 0,13                         | 0,00                        |
| <b>Liverdun</b>     | 0,00                        | 0,85                         | 0,15                        |

[1] Kalachova, K.; Pulkrabova, J.; Drabova, L.; Cajka, T.; Kocourek, V.; Hajslova, J. Simplified and rapid determination of polychlorinated biphenyls, polybrominated diphenyl ethers, and polycyclic aromatic hydrocarbons in fish and shrimps integrated into a single method. Anal. Chim. Acta 2011, 707, 84–91, doi:10.1016/j.aca.2011.09.016.

**Supplementary Table 4** – Acquisition and post-processing parameters of 1D and 2D NMR spectra acquired on a 600 MHz spectrometer. *Spectra acquisition was performed on a Bruker AVANCE III 600 MHz spectrometer equipped with a z-gradient 5-mm TCI cryoprobe at the ICMR (Institute of Molecular Chemistry) of Reims Champagne Ardennes university, France.*

|                              | <sup>1</sup> H | <sup>1</sup> H- <sup>1</sup> H JRES | <sup>1</sup> H- <sup>1</sup> H COSY | <sup>1</sup> H- <sup>1</sup> H TOCSY | <sup>1</sup> H- <sup>13</sup> C HSQC |
|------------------------------|----------------|-------------------------------------|-------------------------------------|--------------------------------------|--------------------------------------|
| <b>AQUISITION</b>            |                |                                     |                                     |                                      |                                      |
| Acquisition sequence         | noesygppr1d    | jresgpprqf                          | cosygpprqf                          | dipsi2gpphpr                         | hsqcedetgpsisp2.2                    |
| Spectrometer frequency (MHz) | 600.16         | [F1;F2]: 600.16                     | [F1;F2]: 600.16                     | [F1;F2]: 600.16                      | [F1]: 150.91<br>[F2]: 600.16         |
| Acquisition mode (QF)        | DQD            | DQD                                 | DQD                                 | DQD                                  | DQD                                  |
| Receiver gain (RG)           | 287            | 575                                 | 645                                 | 645                                  | 2050                                 |
| Dwell time (μsec)            | 41.6           | 83.2                                | 83.2                                | 83.2                                 | 83.2                                 |
| Pre-scan delay (DE) (μsec)   | 10             | 10                                  | 10                                  | 10                                   | 10                                   |
| Nb dummy scan (DS)           | 4              | 8                                   | 8                                   | 128                                  | 256                                  |
| Nb of Scans (NS)             | 128            | 32                                  | 4                                   | 8                                    | 8                                    |
| Acquisition time F1 (sec)    | 2.73           | 1.60                                | 0.26                                | 0.06                                 | 0.04                                 |
| Acquisition time F2 (sec)    | -              | 0.68                                | 0.34                                | 0.34                                 | 0.13                                 |
| Size of FID F1 (TD)          | 65536          | 64                                  | 1536                                | 768                                  | 2048                                 |
| Size of FID F2 (TD)          | -              | 8192                                | 4096                                | 4096                                 | 1514                                 |
| Spectral width F1            | 20 ppm         | 10 ppm                              | 10 ppm                              | 10 ppm                               | 10 ppm                               |
| Spectral width F2            | -              | 40 Hz                               | 10 ppm                              | 10 ppm                               | 184 ppm                              |
| <b>POST-PROCESSING</b>       |                |                                     |                                     |                                      |                                      |
| Real data point F1           | 128 K          | 128                                 | 2048                                | 2048                                 | 1024                                 |
| Real data point F2           | -              | 8192                                | 4096                                | 4096                                 | 2048                                 |

**Supplementary Table 5** – Acquisition and post-processing parameters of 1D and 2D NMR spectra acquired on a 800 MHz spectrometer. *Spectra acquisition was performed on a Bruker Avance III HD 800 MHz spectrometer equipped with a 5 mm quadruple resonance QCI-P (H/P–C/N/D) cryogenically cooled probe head at the MetaToul.*

|                              | <sup>1</sup> H- <sup>13</sup> C HSQC | <sup>1</sup> H- <sup>31</sup> P<br>HSQC TOCSY |
|------------------------------|--------------------------------------|-----------------------------------------------|
| <b>AQUISITION</b>            |                                      |                                               |
| Acquisition sequence         | hsqcetgpsisp2.4                      | na_hsqcetf3gpxy                               |
| Spectrometer frequency (MHz) | [F1]: 201.20<br>[F2]: 800.13         | [F1]: 323.90<br>[F2]: 800.13                  |
| Acquisition mode (QF)        | DQD                                  | DQD                                           |
| Receiver gain (RG)           | 912                                  | 32                                            |
| Dwell time (μsec)            | 44.8                                 | 44.8                                          |
| Pre-scan delay (DE) (μsec)   | 10                                   | 10                                            |
| Nb dummy scan (DS)           | 16                                   | 16                                            |
| Nb of Scans (NS)             | 64                                   | 64                                            |
| Acquisition time F2 (sec)    | 0.11                                 | 0.11                                          |
| Acquisition time F1 (sec)    | 0.04                                 | 0.05                                          |
| Size of FID F2 (TD)          | 2048                                 | 2048                                          |
| Size of FID F1 (TD)          | 256                                  | 1024                                          |
| Spectral width F1            | 184 ppm                              | 30 ppm                                        |
| Spectral width F2            | 12 ppm                               | 12 ppm                                        |
| <b>POST-PROCESSING</b>       |                                      |                                               |
| Real data point F1           | 1024                                 | 2048                                          |
| Real data point F2           | 4096                                 | 4096                                          |

**Supplementary Table 6** – List of the 24 metabolites validated by spiking into Mix samples

| Metabolite                             | Detection in the representative spectra | Spiked concentration (μM) |
|----------------------------------------|-----------------------------------------|---------------------------|
| <b>Amino acids</b>                     |                                         |                           |
| Asparagine                             | Yes                                     | 52                        |
| Glutamine                              | Yes                                     | 36                        |
| Glycine                                | Yes                                     | 35                        |
| Histidine                              | Yes                                     | 48                        |
| Phenylalanine                          | Yes                                     | 306                       |
| Tryptophane                            | Yes                                     | 52                        |
| Lysine                                 | Yes                                     | 94                        |
| <b>Amine compounds &amp; osmolites</b> |                                         |                           |
| Choline                                | Yes                                     | 52                        |
| Sarcosine                              | No                                      | 50                        |
| <b>Nucleotides</b>                     |                                         |                           |
| ATP                                    | Yes                                     | 55                        |
| ADP                                    | Yes                                     | 48                        |
| AMP                                    | Yes                                     | 47                        |
| UTP                                    | No                                      | 49                        |
| UDP                                    | No                                      | 51                        |
| UMP                                    | Yes                                     | 26                        |
| IMP                                    | No                                      | 46                        |
| Adenosine                              | Yes                                     | 50                        |
| <b>Coenzymes</b>                       |                                         |                           |
| NAD                                    | Yes                                     | 52                        |
| NADH                                   | Yes                                     | 50                        |
| NADPH                                  | No                                      | 52                        |
| <b>Carbohydrates</b>                   |                                         |                           |
| Glucose                                | Yes                                     | 31                        |
| Maltose                                | Yes                                     | 61                        |
| Glucose-1-phosphate                    | No                                      | 50                        |
| Glucose-6-phosphate                    | No                                      | 50                        |

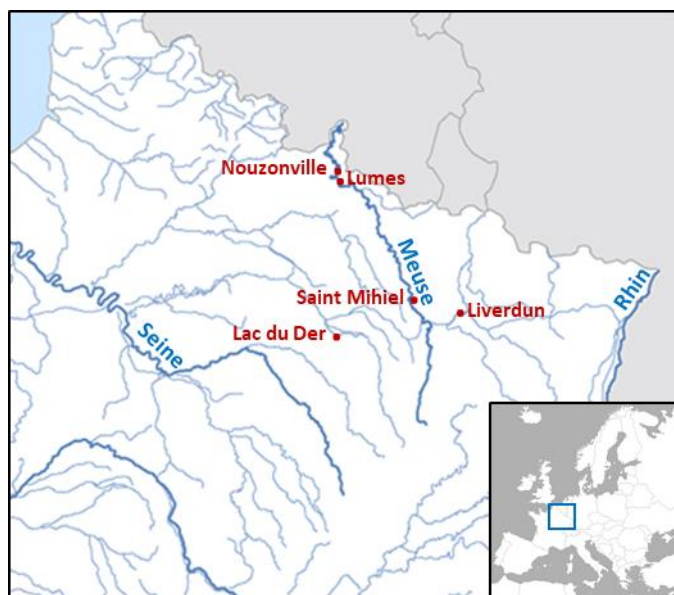

**Supplementary Figure 1** - Geographical localizations of the sampling (Lac du Der-Chantecoq; 4°45'00" E; 48°34'00" N) and caging sites along the Moselle (Liverdun; 6°40'4303" E; 48°44'44.3620" N) and Meuse river (5°32'27.6180" E; 48°52'12.9349" N - 4°44'28.1306" E; 49°48'58.8740" N - 4°46'29.5799" E; 49°44'18.4070" N). All sites are located in France.

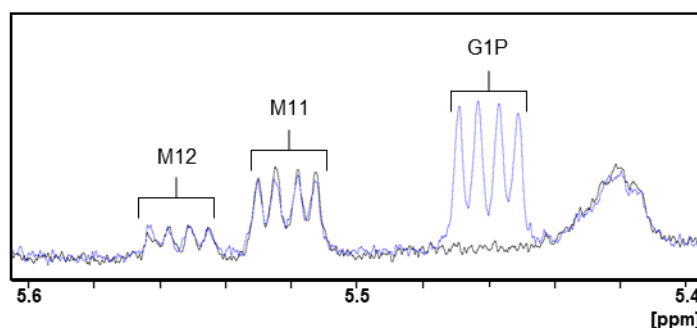

**Supplementary Figure 2** – 5.4 to 5.6 ppm region of the *D. polymorpha* <sup>1</sup>H representative spectrum. Pairs of doublets characteristic of sugar 1-phosphate resonance from G1P (glucose 1-phosphate), unknown metabolite M11 (peaks 178 & 179) and unknown metabolite M12 (peaks 180 & 181) are indicated by brackets. The black spectrum corresponds to original Mix sample spectrum, and the blue one to Mix sample spiked with glucose 1-phosphate.
